# Supplementary material for: Bacterial Biomarkers of Marcellus Shale Activity in Pennsylvania
Source: Front Microbiol. 2018 Aug 2;9:1697. doi: 10.3389/fmicb.2018.01697 (PMC6083035; doi:10.3389/fmicb.2018.01697)
Supplement: Supplementary file 2 [file Table_2.XLSX]

## Sheet: Sheet1
Supplemental Table 2. Habitat and landuse information for sampled streams.
SampleID	StrmCode	Open_Water (%)	Developed_Open_Space (%)	Developed_Low_Intensity (%)	Developed_Medium_Intensity (%)	Barren_Land (%)	Deciduous_Forest (%)	Evergreen_Forest (%)	Mixed_Forest (%)	Shrub/Scrublands (%)	Grassland/Herbaceous (%)	Pasture/Hay (%)	Cultivated_Crops (%)	Woody_Wetlands (%)	Emergent_Herbaceous_Wetland (%)	UOG_Drilling_Presence	Elevation (m)	EPA_EcoRegion_L1_KEY	EPA_EcoRegion_L2_KEY	EPA_EcoRegion_L3_KEY	EPA_EcoRegion_L4_KEY	HUC8Watershed	HUC10Watershed	Stream_Order
G.2016.15	Trib20301	0.3	3.8	0	0	0	29.3	10.8	12.5	3.1	0	19.8	15.8	4.1	0.5	UOG+	450	8 EASTERN TEMPERATE FORESTS	8.1 MIXED WOOD PLAINS	60 Northern Allegheny Plateau	60a Glaciated Low Allegheny Plateau	Lower West Branch Susquehanna River	Little Loyalsock Creek	2
G.2016.16	Trib20129	1.7	3.7	0	0	0	52.6	0.3	15.5	21.5	0.5	1.8	0.9	0.9	0.7	UOG-	490	5 NORTHERN FORESTS	5.3 ATLANTIC HIGHLANDS	62 North Central Appalachians	62c Glaciated High Allegheny Plateau	Lower West Branch Susquehanna River	Upper Loyalsock Creek	1
G.2016.17	Trib20122	0	1	0	0	0	26.5	0	17.2	53.3	0	0	0	1.9	0	UOG_abandoned	496	5 NORTHERN FORESTS	5.3 ATLANTIC HIGHLANDS	62 North Central Appalachians	62c Glaciated High Allegheny Plateau	Lower West Branch Susquehanna River	Upper Loyalsock Creek	1
G.2016.18	Trib20207	0	4.1	1.1	0	0	20.2	11.3	19.4	1.9	0	18.4	23.3	0.4	0	UOG-	508	5 NORTHERN FORESTS	5.3 ATLANTIC HIGHLANDS	62 North Central Appalachians	62c Glaciated High Allegheny Plateau	Lower West Branch Susquehanna River	Upper Loyalsock Creek	1
G.2016.19	Trib20256	0	0	0	0	0	86.5	1.4	12.1	0	0	0	0	0	0	UOG-	555	5 NORTHERN FORESTS	5.3 ATLANTIC HIGHLANDS	62 North Central Appalachians	62c Glaciated High Allegheny Plateau	Lower West Branch Susquehanna River	Upper Loyalsock Creek	2
G.2016.20	Trib20404	1.1	0.3	0	0.8	15.2	30.9	1.6	17.8	4.5	23.3	0	0	4.2	0.3	UOG-	381	8 EASTERN TEMPERATE FORESTS	8.1 MIXED WOOD PLAINS	60 Northern Allegheny Plateau	60a Glaciated Low Allegheny Plateau	Lower West Branch Susquehanna River	Little Loyalsock Creek	1
G.2016.21	DBO02186	0.1	2.7	0.1	0	0	44.6	1.9	14.1	2.4	0.2	26	5.6	1.9	0.2	UOG+	431	8 EASTERN TEMPERATE FORESTS	8.1 MIXED WOOD PLAINS	60 Northern Allegheny Plateau	60a Glaciated Low Allegheny Plateau	Lower West Branch Susquehanna River	Lower Loyalsock Creek	2
G.2016.22	WeedCreek	0.4	2.3	0	0	0.1	53.6	1.7	25.3	3.7	0.6	4.4	6	1.2	0.6	UOG+	431	8 EASTERN TEMPERATE FORESTS	8.1 MIXED WOOD PLAINS	60 Northern Allegheny Plateau	60a Glaciated Low Allegheny Plateau	Lower West Branch Susquehanna River	Lower Loyalsock Creek	2
G.2016.23	Trib20257	0	3.1	0	0	0	44.3	1.5	46.3	2.5	0	0	2.3	0	0	UOG+	482	8 EASTERN TEMPERATE FORESTS	8.1 MIXED WOOD PLAINS	60 Northern Allegheny Plateau	60a Glaciated Low Allegheny Plateau	Lower West Branch Susquehanna River	Lower Loyalsock Creek	1
G.2016.24	Trib20281	0	4.7	0	0	0	36.6	2.1	12.2	2.1	0	7.6	33.5	0.4	0.8	UOG-	478	8 EASTERN TEMPERATE FORESTS	8.1 MIXED WOOD PLAINS	60 Northern Allegheny Plateau	60a Glaciated Low Allegheny Plateau	Lower West Branch Susquehanna River	Lower Loyalsock Creek	2
G.2016.25	Trib20403	0	0	0	0	0.4	70.8	1.1	18.1	9.4	0.2	0	0	0	0	UOG+	553	5 NORTHERN FORESTS	5.3 ATLANTIC HIGHLANDS	62 North Central Appalachians	62c Glaciated High Allegheny Plateau	Lower West Branch Susquehanna River	Little Loyalsock Creek	1
G.2016.26	ChilsonRun	1.5	0.4	0	0	0	50.8	0	4.7	37.9	1.3	0	0	3.3	0	UOG+	471	5 NORTHERN FORESTS	5.3 ATLANTIC HIGHLANDS	62 North Central Appalachians	62c Glaciated High Allegheny Plateau	Upper Susquehanna River-Tunkhannock	Schrader Creek	1
G.2016.27	Trib30354	0	0.3	0	0	0	30.2	0	3	59.5	4.4	0	0.4	2.2	0	UOG+	482	5 NORTHERN FORESTS	5.3 ATLANTIC HIGHLANDS	62 North Central Appalachians	62c Glaciated High Allegheny Plateau	Upper Susquehanna River-Tunkhannock	Schrader Creek	1
G.2016.28	Trib30355	0	0	0	0	0	78.7	0	15.1	6.2	0	0	0	0	0	UOG+	487	5 NORTHERN FORESTS	5.3 ATLANTIC HIGHLANDS	62 North Central Appalachians	62c Glaciated High Allegheny Plateau	Upper Susquehanna River-Tunkhannock	Schrader Creek	2
G.2016.29	Trib20292	0	9.7	0	0	0	12.2	1.2	10.7	1.6	0	44.2	20.1	0.4	0	UOG+	365	8 EASTERN TEMPERATE FORESTS	8.1 MIXED WOOD PLAINS	60 Northern Allegheny Plateau	60a Glaciated Low Allegheny Plateau	Lower West Branch Susquehanna River	Little Loyalsock Creek	2
G.2016.30	Trib20258	0.1	4.5	0.1	0	0	25	18.7	17.9	1.5	0.2	14.2	12.7	5	0	UOG+	382	8 EASTERN TEMPERATE FORESTS	8.1 MIXED WOOD PLAINS	60 Northern Allegheny Plateau	60a Glaciated Low Allegheny Plateau	Lower West Branch Susquehanna River	Little Loyalsock Creek	2
G.2016.31	Trib20405	0	0	0	0	0	51.6	1.4	26.9	17.5	0	0	0	2.7	0	UOG+	417	8 EASTERN TEMPERATE FORESTS	8.1 MIXED WOOD PLAINS	60 Northern Allegheny Plateau	60a Glaciated Low Allegheny Plateau	Lower West Branch Susquehanna River	Little Loyalsock Creek	2
G.2016.32	Trib20450	0	2	0	0	0	80	0.2	5.4	5.2	0	0	0.4	6.7	0.1	UOG+	436	8 EASTERN TEMPERATE FORESTS	8.1 MIXED WOOD PLAINS	60 Northern Allegheny Plateau	60a Glaciated Low Allegheny Plateau	Lower West Branch Susquehanna River	Little Loyalsock Creek	1
G.2016.33	DBO12725	0	0.3	0	0	1.1	71.9	1.3	22.4	2.9	0.2	0	0	0	0	UOG+	262	5 NORTHERN FORESTS	5.3 ATLANTIC HIGHLANDS	62 North Central Appalachians	62c Glaciated High Allegheny Plateau	Lower West Branch Susquehanna River	Lycoming Creek	1
G.2016.34	DBO03225	0	0.1	0	0	1.5	66.2	0.6	22.1	5.1	4.3	0	0	0	0	UOG+	313	5 NORTHERN FORESTS	5.3 ATLANTIC HIGHLANDS	62 North Central Appalachians	62c Glaciated High Allegheny Plateau	Lower West Branch Susquehanna River	Lycoming Creek	1
G.2016.35	LowerGrays	0.1	0.6	0	0	0.3	65.5	2.6	24.7	4.8	1	0.1	0	0.4	0	UOG+	255	8 EASTERN TEMPERATE FORESTS	8.1 MIXED WOOD PLAINS	60 Northern Allegheny Plateau	60a Glaciated Low Allegheny Plateau	Lower West Branch Susquehanna River	Lycoming Creek	3
G.2016.36	UpperGrays	0.1	0.6	0	0	0.1	68.2	3.3	21.6	4.8	0.6	0.1	0	0.7	0	UOG+	335	8 EASTERN TEMPERATE FORESTS	8.1 MIXED WOOD PLAINS	60 Northern Allegheny Plateau	60a Glaciated Low Allegheny Plateau	Lower West Branch Susquehanna River	Lycoming Creek	3
G.2016.37	Knickerbocker	0	2.5	0.2	0	0	40.9	3.2	14.7	4	0.3	25.6	8.6	0	0	UOG-	559	5 NORTHERN FORESTS	5.3 ATLANTIC HIGHLANDS	62 North Central Appalachians	62d Unglaciated High Allegheny Plateau	Sinnemahoning Creek	First Fork Sinnemahoning Creek	1
G.2016.38	Trib24394	0	0.2	0	0	0	86.1	0.5	8.3	3.7	1.3	0	0	0	0	UOG-	470	5 NORTHERN FORESTS	5.3 ATLANTIC HIGHLANDS	62 North Central Appalachians	62d Unglaciated High Allegheny Plateau	Sinnemahoning Creek	First Fork Sinnemahoning Creek	2
G.2016.39	Trib24268	0	0	0	0	0.3	70.3	1.9	20.1	7.3	0	0	0	0	0	UOG-	361	5 NORTHERN FORESTS	5.3 ATLANTIC HIGHLANDS	62 North Central Appalachians	62d Unglaciated High Allegheny Plateau	Sinnemahoning Creek	First Fork Sinnemahoning Creek	2
G.2016.40	Trib24405	0	1.8	0	0	0.6	57	1.1	1.4	13.3	5.4	19.2	0	0.1	0	UOG-	535	5 NORTHERN FORESTS	5.3 ATLANTIC HIGHLANDS	62 North Central Appalachians	62d Unglaciated High Allegheny Plateau	Sinnemahoning Creek	First Fork Sinnemahoning Creek	2
G.2016.41	Trib24401	0	0	0	0	0	84.8	2.1	3.3	7.5	0.4	0	1.9	0	0	UOG-	512	5 NORTHERN FORESTS	5.3 ATLANTIC HIGHLANDS	62 North Central Appalachians	62d Unglaciated High Allegheny Plateau	Sinnemahoning Creek	First Fork Sinnemahoning Creek	2
G.2016.42	Trib24223	0	0.1	0	0	0	80.4	0	16.4	2.1	0.9	0.2	0	0	0	UOG-	432	5 NORTHERN FORESTS	5.3 ATLANTIC HIGHLANDS	62 North Central Appalachians	62d Unglaciated High Allegheny Plateau	Sinnemahoning Creek	First Fork Sinnemahoning Creek	3
G.2016.43	LittleBailey	0	0.3	0	0	0	79	2.7	9.4	8.5	0	0.2	0	0	0	UOG-	369	5 NORTHERN FORESTS	5.3 ATLANTIC HIGHLANDS	62 North Central Appalachians	62d Unglaciated High Allegheny Plateau	Sinnemahoning Creek	First Fork Sinnemahoning Creek	2
G.2016.44	LeftForkBrooks	0	0	0	0	0	55.1	6.6	21.1	9.3	7.9	0	0	0	0	UOG-	495	5 NORTHERN FORESTS	5.3 ATLANTIC HIGHLANDS	62 North Central Appalachians	62d Unglaciated High Allegheny Plateau	Sinnemahoning Creek	First Fork Sinnemahoning Creek	2
G.2016.45	LickIsland	0	0.1	0	0	0	42.5	6	41.5	8.2	1.5	0.1	0	0	0	UOG-	291	5 NORTHERN FORESTS	5.3 ATLANTIC HIGHLANDS	62 North Central Appalachians	62d Unglaciated High Allegheny Plateau	Sinnemahoning Creek	First Fork Sinnemahoning Creek	3
