# Supplementary material for: Bacterial Biomarkers of Marcellus Shale Activity in Pennsylvania
Source: Front Microbiol. 2018 Aug 2;9:1697. doi: 10.3389/fmicb.2018.01697 (PMC6083035; doi:10.3389/fmicb.2018.01697)
Supplement: Supplementary file 4 [file Table_4.XLSX]

## Sheet: Sheet1
Supplemental Table 4. Correlations between metadata and OTUs. Correlations between taxa identified by LEfSe and metadata and top five strongest correlations between other families and metadata are shown.
Spearman correlations were calcuated using the Hmisc package in R.
Alkalinity				Conductivity				pH
	OTU	Spearman's rho	p-value		OTU	Spearman's rho	p-value		OTU	Spearman's rho	p-value
	Desulfovibrionaceae	-0.644205	0.000287493		Cellulomonadaceae	0.636142	0.000361625		Trueperaceae	0.697938	5.18097e-05
	oc28	-0.579936	0.00152085		Bacteriovoracaceae	0.614164	0.000654895		Nocardioidaceae	0.669211	0.000135136
	IIb	-0.57169	0.0018381		oc28	-0.60928	0.0007429		Marinicellaceae	0.624637	0.000496213
	Bacillaceae	0.570469	0.00188963		Desulfovibrionaceae	-0.592777	0.00112089		Oleiphilaceae	0.605431	0.000819331
	Planctomycetaceae	0.560086	0.00238023		Methylophilales	-0.581197	0.00147678		Solirubrobacterales	0.585865	0.00132305
	EB1003	-0.516484	0.0281901		EB1003	-0.516484	0.00147678		Shewanellaceae	0.393102	0.0425136
	Shewanellaceae	0.389764	0.0444609		Flammeovirgaceae	0.48565	0.0102273
					Shewanellaceae	0.412793	0.0323618
Temperature				Wells
	OTU	Spearman's rho	p-value		OTU	Spearman's rho	p-value
	Gaiellaceae	0.707786	3.63546e-05		Hyphomicrobiaceae	-0.596302	0.00165556
	Syntrophobacteraceae	0.655878	0.000203829		envOPS12	0.595052	0.00170306
	5B.12	0.650956	0.000236049		Moraxellaceae	0.582134	0.00226623
	TK17	0.644363	0.000286184		Alteromonadaceae	0.579634	0.00239185
	32-20	0.617405	0.000601641		Cytophagaceae	0.559632	0.00362827
	PRR-10	0.605802	0.000811686		Rubrobacteraceae	0.55799	0.00375028
	Rhodospirillaceae	0.526107	0.00482117		Methanobacteriaceae	0.517291	0.0080939
	Leptospirillaceae	0.487742	0.00985845		Shewanellaceae	0.495338	0.0118116
	Nitrospiraceae	0.405191	0.0360208		Leptospirillaceae	0.46909	0.0180053
					EB1003	-0.432954	0.0306327
