# Supplementary material for: Bacterial Biomarkers of Marcellus Shale Activity in Pennsylvania
Source: Front Microbiol. 2018 Aug 2;9:1697. doi: 10.3389/fmicb.2018.01697 (PMC6083035; doi:10.3389/fmicb.2018.01697)
Supplement: Supplementary file 6 [file Table_6.XLSX]

## Sheet: Sheet1
Supplemental Table 6. Nearest sequenced taxon index scores for samples used in PICRUSt analysis. NSTI scores indicate how well the reference genome covered the sequences in the samples.
SampleID	Metric	Value
G.2016.15	Weighted NSTI	0.190366
G.2016.16	Weighted NSTI	0.178679
G.2016.18	Weighted NSTI	0.164743
G.2016.19	Weighted NSTI	0.172928
G.2016.20	Weighted NSTI	0.19091
G.2016.21	Weighted NSTI	0.178132
G.2016.22	Weighted NSTI	0.162247
G.2016.23	Weighted NSTI	0.166777
G.2016.27	Weighted NSTI	0.204099
G.2016.28	Weighted NSTI	0.179839
G.2016.29	Weighted NSTI	0.189061
G.2016.30	Weighted NSTI	0.1618
G.2016.31	Weighted NSTI	0.139883
G.2016.32	Weighted NSTI	0.19167
G.2016.33	Weighted NSTI	0.166792
G.2016.34	Weighted NSTI	0.18122
G.2016.35	Weighted NSTI	0.15906
G.2016.36	Weighted NSTI	0.182188
G.2016.37	Weighted NSTI	0.164349
G.2016.38	Weighted NSTI	0.193476
G.2016.39	Weighted NSTI	0.186211
G.2016.40	Weighted NSTI	0.190623
G.2016.41	Weighted NSTI	0.196005
G.2016.42	Weighted NSTI	0.127929
G.2016.43	Weighted NSTI	0.18362
G.2016.44	Weighted NSTI	0.175761
G.2016.45	Weighted NSTI	0.190793
